# Supplementary material for: Anisotropic acoustic phonon polariton-enhanced infrared spectroscopy for single molecule detection
Source: Royal Society of Chemistry journal article supplement (doi:10.1039/d1nr01701b), 2021-01-01
Supplement: d1nr01701b1.pdf [file d1nr01701b1.pdf]

## Supporting information

### **Anisotropic acoustic phonon polariton-enhanced infrared spectroscopy for single molecule detection**

Wei Lyu<sup>a,b,c</sup>, Hanchao Teng<sup>b,c</sup>, Chenchen Wu<sup>b,c</sup>, Xiaotao Zhang<sup>a</sup>, Xiangdong Guo<sup>\*b,c</sup>,  
Xiaoxia Yang<sup>\*b,c</sup>, Qing Dai<sup>\*b,c</sup>

<sup>a</sup>*Tianjin Key Laboratory of Molecular Optoelectronic Sciences, Department of Chemistry, School of Science, Tianjin University, Tianjin 300072, China.*

<sup>b</sup>*CAS Key Laboratory of Nanophotonic Materials and Devices, CAS Key Laboratory of Standardization and Measurement for Nanotechnology, CAS Center for Excellence in Nanoscience, National Center for Nanoscience and Technology, Beijing 100190, China.*

<sup>c</sup>*Center of Materials Science and Optoelectronics Engineering, University of Chinese Academy of Sciences, Beijing 100049, China.*

*\*E-mail: [daiq@nanoctr.cn](mailto:daiq@nanoctr.cn); [yangxx@nanoctr.cn](mailto:yangxx@nanoctr.cn); [guoxd@nanoctr.cn](mailto:guoxd@nanoctr.cn)*

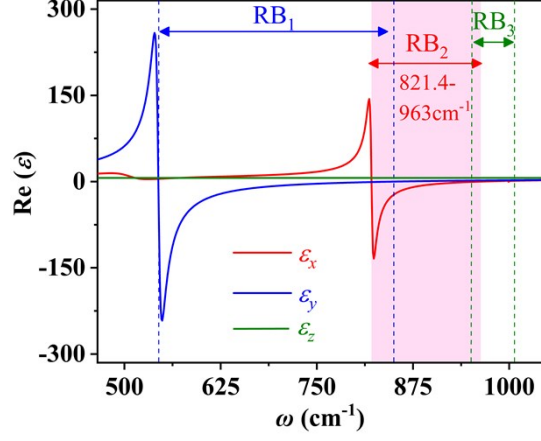

**Fig. S1** The real part of the permittivity of  $\alpha$ -MoO<sub>3</sub> in RB<sub>2</sub> is used in this study.

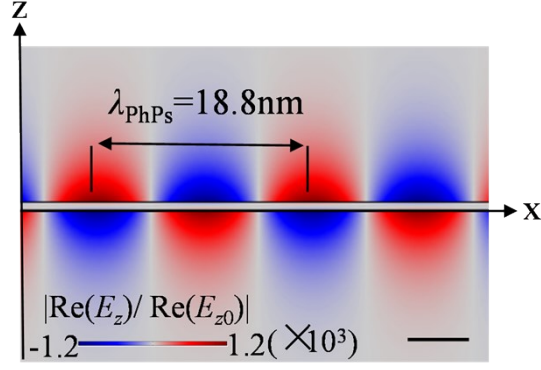

**Fig. S2** Normalized electric field distribution  $\text{Re}(E_z)/\text{Re}(E_{z,\text{PhPs}})$  of freestanding  $\alpha$ -MoO<sub>3</sub> monolayer PhPs at  $\omega = 880 \text{ cm}^{-1}$ . The wavelengths of the PhPs are indicated by horizontal arrows. Scale bar: 5 nm.

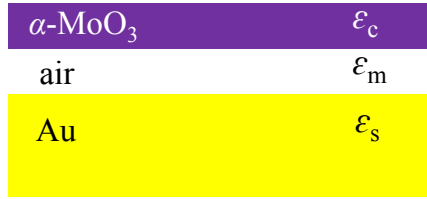

**Fig. S3** Side view of the layered structure of monolayer  $\alpha$ -MoO<sub>3</sub>/nano airgap/Au.

We calculate the dispersion of APhPs via the Fresnel reflection coefficient  $r_p(q, \omega)$  method by modeling the sample as multilayer structure of monolayer  $\alpha$ -MoO<sub>3</sub>/nano airgap/Au.

The total reflectivity of this system is determined by following Equations:

$$r_p = \left( r_c + r_s e^{i2k_m^z d} \right) / \left( 1 + r_c r_s e^{i2k_m^z d} \right) \quad (\text{S1})$$

$$r_c = \left( \epsilon_m \perp k_c^z - \epsilon_c \perp k_m^z \right) / \left( \epsilon_m \perp k_c^z + \epsilon_c \perp k_m^z \right) \quad (\text{S2})$$

$$r_s = \left( -\varepsilon_{m \perp} k_s^z + \varepsilon_{c \perp} k_m^z \right) / \left( \varepsilon_{m \perp} k_s^z + \varepsilon_{c \perp} k_m^z \right) \quad (\text{S3})$$

Where the subscripts “c”, “m” and “s” denote the  $\alpha$ -MoO<sub>3</sub>, air and Au, respectively.  $d$  is the thickness of the monolayer  $\alpha$ -MoO<sub>3</sub>.  $r_c$  and  $r_s$  represent the reflectivity of the  $\alpha$ -MoO<sub>3</sub>/air and air/Au interfaces, respectively. The  $\varepsilon_{c \perp}$ ,  $\varepsilon_{m \perp}$  represent the out-plane dielectric functions of  $\alpha$ -MoO<sub>3</sub> and air, respectively.  $k_i^z$  is momentum component of the propagating wave along the  $z$  axis, which can be obtained by

$$k_i^z = \sqrt{\varepsilon_{i \perp} (\omega/c)^2 - \left[ (\varepsilon_{i \perp} / \varepsilon_{i \parallel}) \cdot q^2 \right]} \quad (\text{S4})$$

Where  $i = c, m$  and  $s$ ,  $\omega$  is the frequency of incident light,  $c$  is the speed of light in vacuum.  $\varepsilon_{i \perp}$  and  $\varepsilon_{i \parallel}$  represent the out- and in-plane dielectric functions of the corresponding  $i$  material. And the in-plane dielectric constant  $\varepsilon_{i \parallel}$  of the  $\alpha$ -MoO<sub>3</sub> is in the  $x$  direction (i.e.,  $\varepsilon_{ix}$ ).

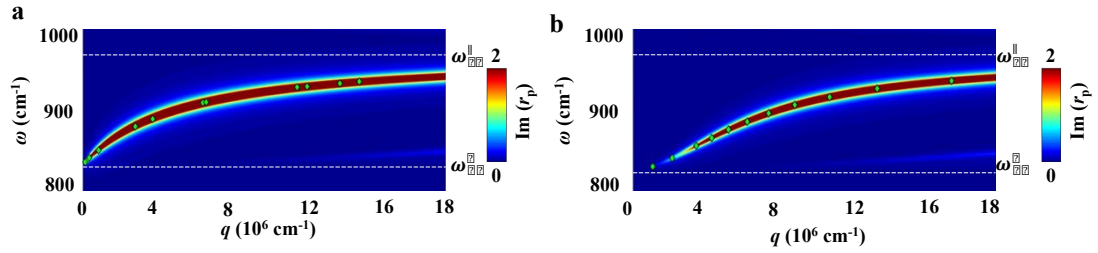

**Fig. S4 (a)** The dispersion relationship of PhPs in RB<sub>2</sub> by calculating the Fresnel reflection coefficient  $r_p(q, \omega)$  of monolayer  $\alpha$ -MoO<sub>3</sub> (false-color image) and the finite element method (FEM) simulation with COMSOL (green dots). **(b)** The dispersion relationship of APhPs in RB<sub>2</sub> by calculating the Fresnel reflection coefficient  $r_p(q, \omega)$  of monolayer  $\alpha$ -MoO<sub>3</sub>/Au heterostructure (false-color image) and the finite element method (FEM) simulation with COMSOL (green dots).

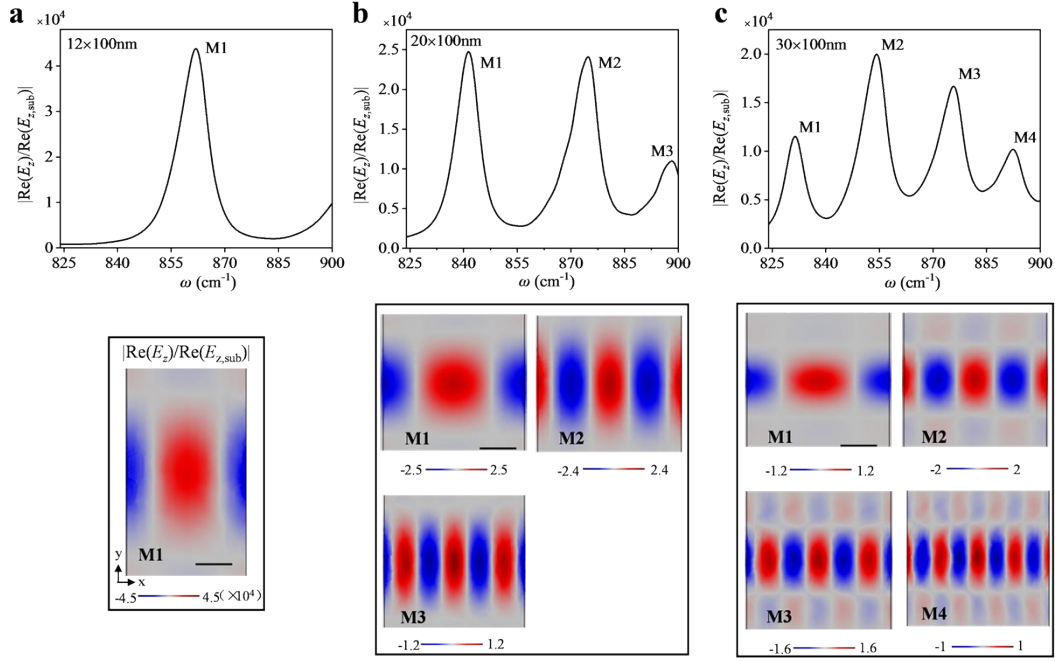

**Fig. S5** (a) Top: Normalized electric-field spectra  $|\text{Re}(E_z)/\text{Re}(E_{z,\text{sub}})|$  of APhPs in  $12 \times 100$  nm monolayer  $\alpha$ -MoO<sub>3</sub>. Bottom: The electric field distribution of the M1 order mode of APhPs. The electric field cross-section is taken from 0.1 nm below  $\alpha$ -MoO<sub>3</sub> at  $\omega = 862$  cm<sup>-1</sup>. Scale bar: 5 nm. (b) Top: Normalized electric-field spectra  $|\text{Re}(E_z)/\text{Re}(E_{z,\text{sub}})|$  of APhPs in  $20 \times 100$  nm monolayer  $\alpha$ -MoO<sub>3</sub>. Bottom: The electric field distribution of the M1 ~ M3 order modes of APhPs. The electric field cross-section is taken from 0.1 nm below  $\alpha$ -MoO<sub>3</sub> at  $\omega = 862$  cm<sup>-1</sup>. Scale bar: 5 nm. (c) Top: Normalized electric-field spectra  $|\text{Re}(E_z)/\text{Re}(E_{z,\text{sub}})|$  of APhPs in  $30 \times 100$  nm monolayer  $\alpha$ -MoO<sub>3</sub>. Bottom: The electric field distribution of the M1 ~ M4 order mode of APhPs. The electric field cross-section is taken from 0.1 nm below  $\alpha$ -MoO<sub>3</sub> at  $\omega = 862$  cm<sup>-1</sup>. Scale bar: 5 nm.

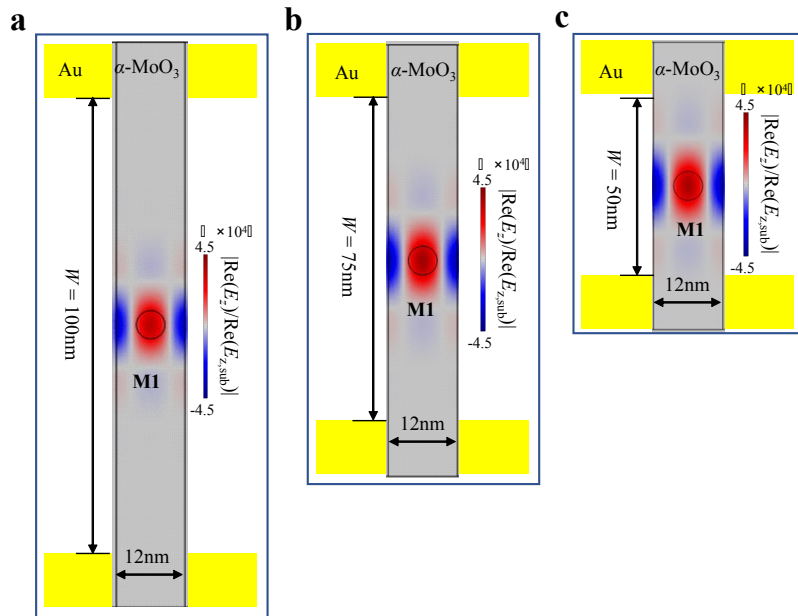

**Fig. S6** (a, b, c) The corresponding APhPs field distribution when the size of  $\alpha$ -MoO<sub>3</sub> in y-direction

becomes 100, 75, 50nm respectively. There are no-APhPs exist in the y-direction of dimensional change. The black circle indicates the position where the single molecule to be detected will be placed. The electric field cross-section is taken from 0.1nm below  $\alpha$ -MoO<sub>3</sub> at  $\omega = 862 \text{ cm}^{-1}$ .

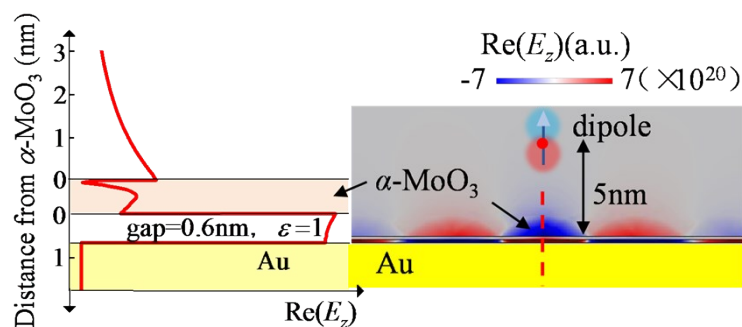

**Fig. S7** Left: Numerical calculation results of the electromagnetic field distribution  $\text{Re}(E_z)$  from the  $\alpha$ -MoO<sub>3</sub> in the z-direction at  $820 \text{ cm}^{-1}$ . The value is derived from the red dashed line in the figure on the right. gap = 0.6 nm,  $\epsilon = 1$ . Right: Simplified side-view schematic of the electric field distribution of APhPs in the s-SNOM measurement. The atomic force microscope (AFM) tip is approximated using a simple electric dipole point-source. The dipole is 5 nm above the  $\alpha$ -MoO<sub>3</sub> monolayer.

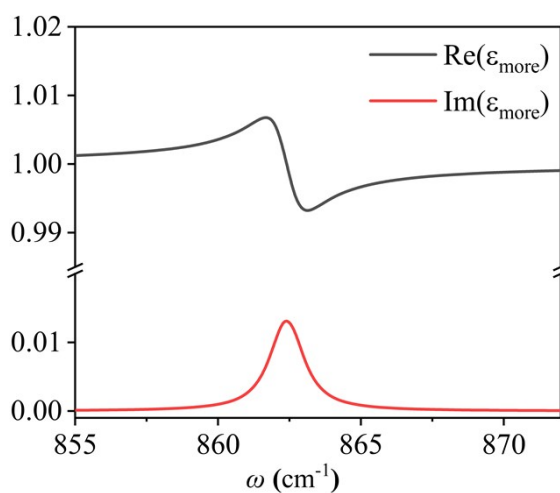

**Fig. S8** Real part (black curve) and imaginary part (red curve) of the permittivity of molecule in the frequency range of interest.

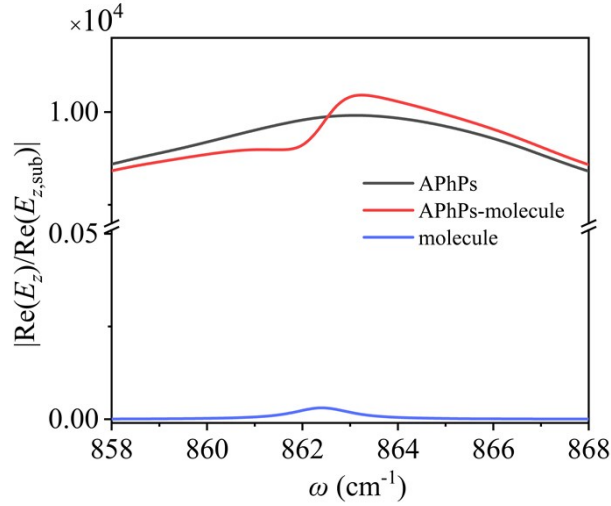

**Fig. S9** Normalized electric-field spectra  $|\text{Re}(E_z)/\text{Re}(E_{z, \text{sub}})|$  of APhPs in infinite  $\alpha\text{-MoO}_3/\text{Au}$  heterostructure for enhancement of the molecular vibration ( $\sim 3$ -folds). APhPs and molecule coupling display a dip feature (red solid curve) and the bare molecule signal spectrum (blue solid curve).

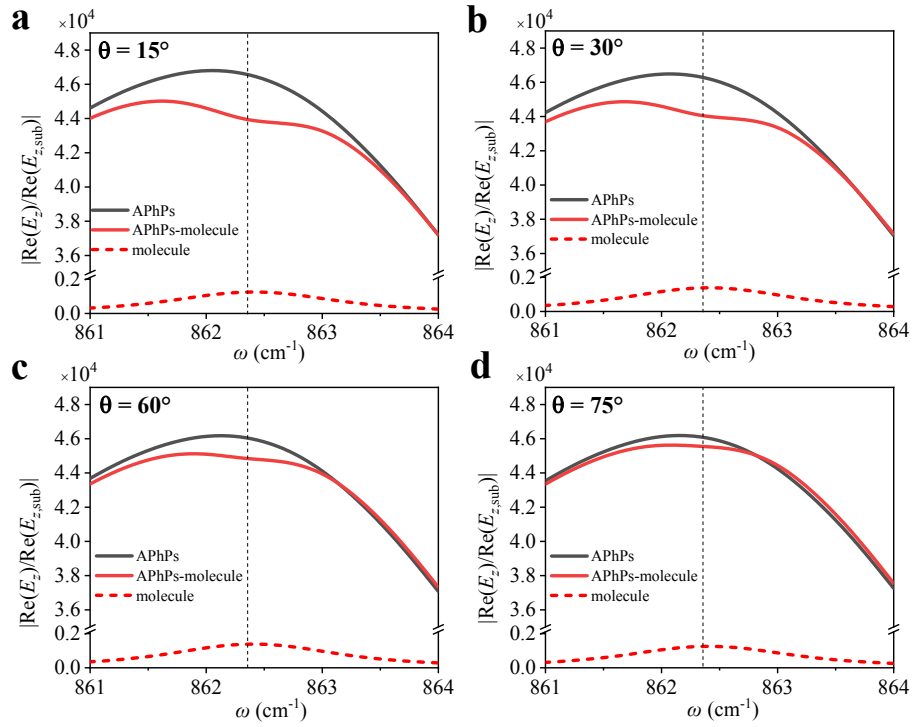

**Fig. S10 (a, b, c, d)** Normalized electric-field spectra  $|\text{Re}(E_z)/\text{Re}(E_{z, \text{sub}})|$  of APhPs when the angle  $\theta$  between the molecular dipole orientation and the APhPs propagation direction is  $15^\circ$ ,  $30^\circ$ ,  $60^\circ$ , and  $75^\circ$ . The coupling spectrum of APhPs and molecule (red solid curve), and the spectrum of molecule signal with enhancement 200-folds (red dashed curve).
